# Supplementary material for: Understanding the role of extracts from sea buckthorn seed residues in anti-melanogenesis properties on B16F10 melanoma cells
Source: Royal Society of Chemistry journal article supplement (doi:10.1039/c8fo01427b), 2018-01-01
Supplement: c8fo01427b1.pdf [file c8fo01427b1.pdf]

### Catechin

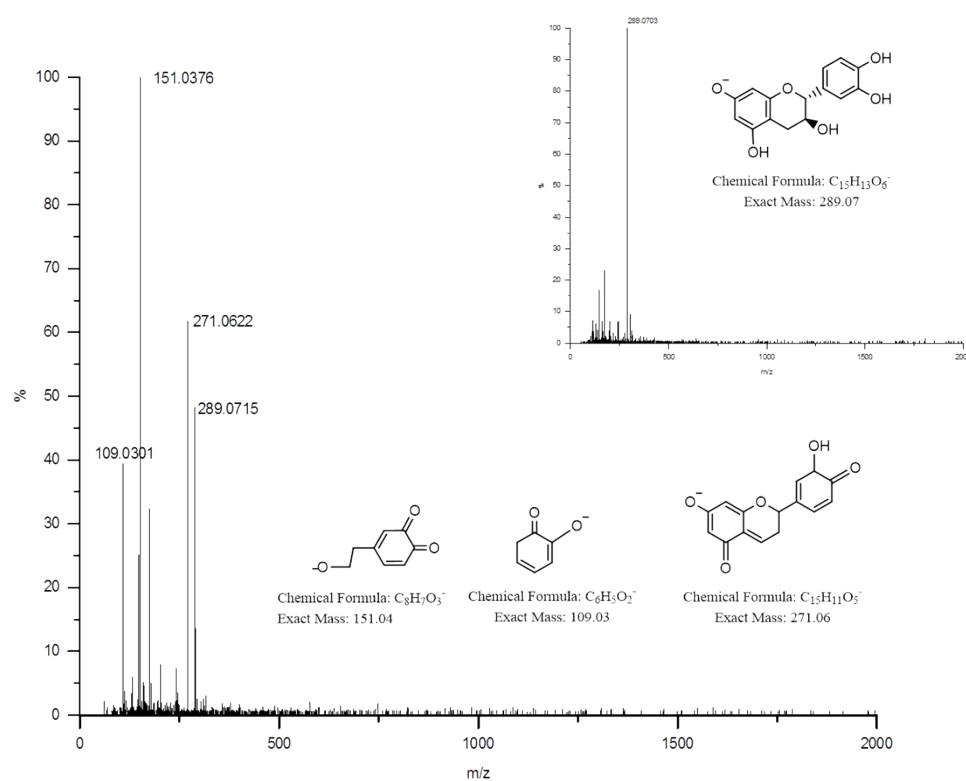

### Gallocatechin

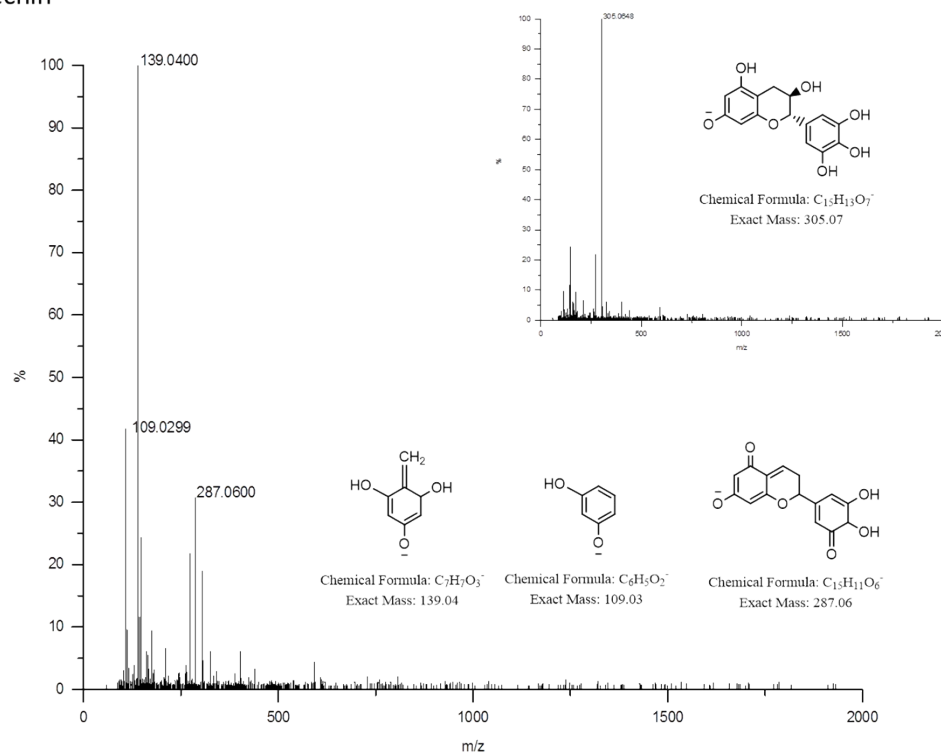

## Epicatechin

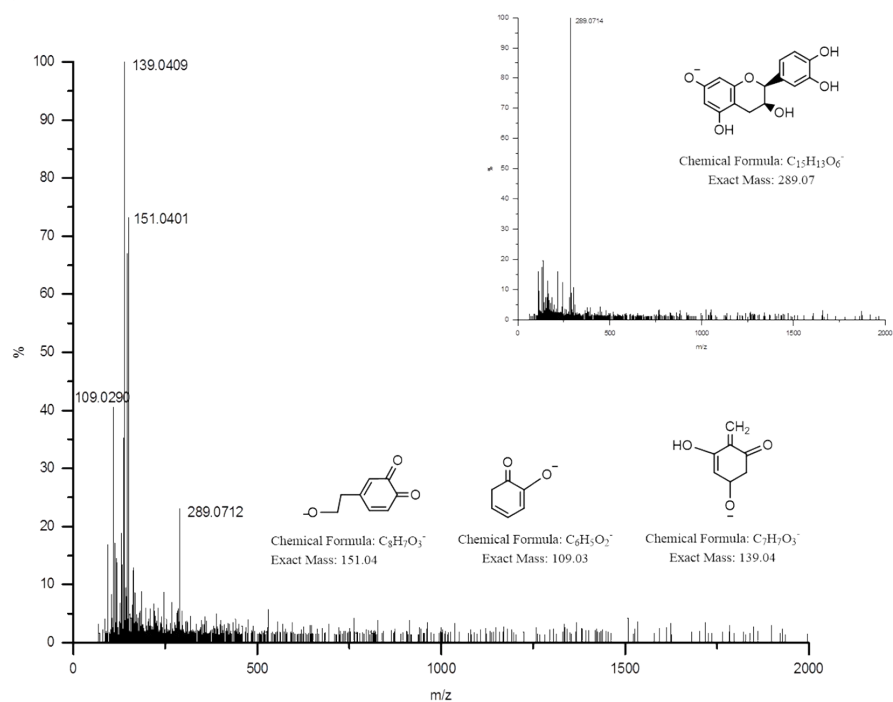

## Myricetin

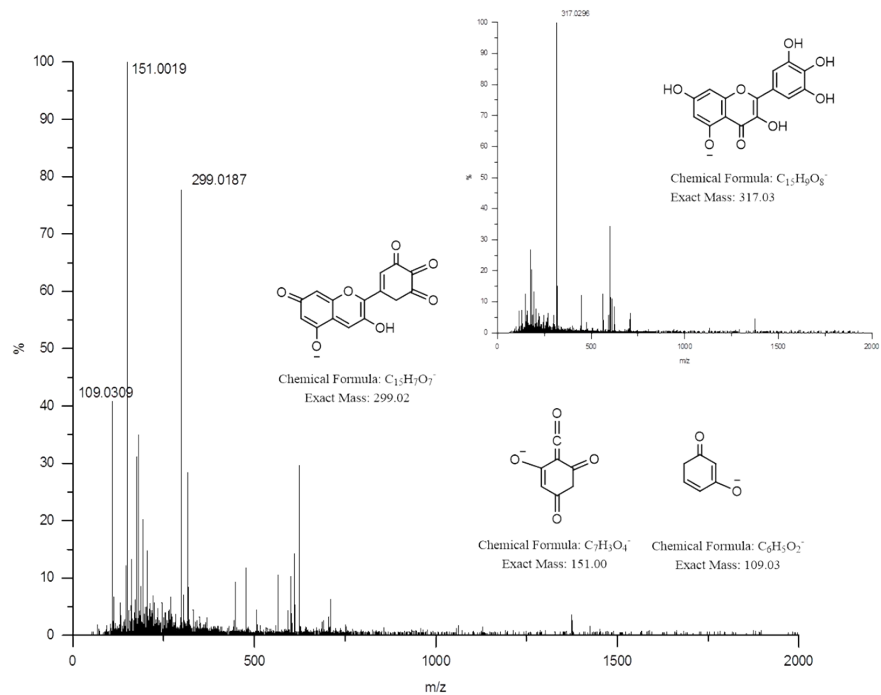

## Quercetin

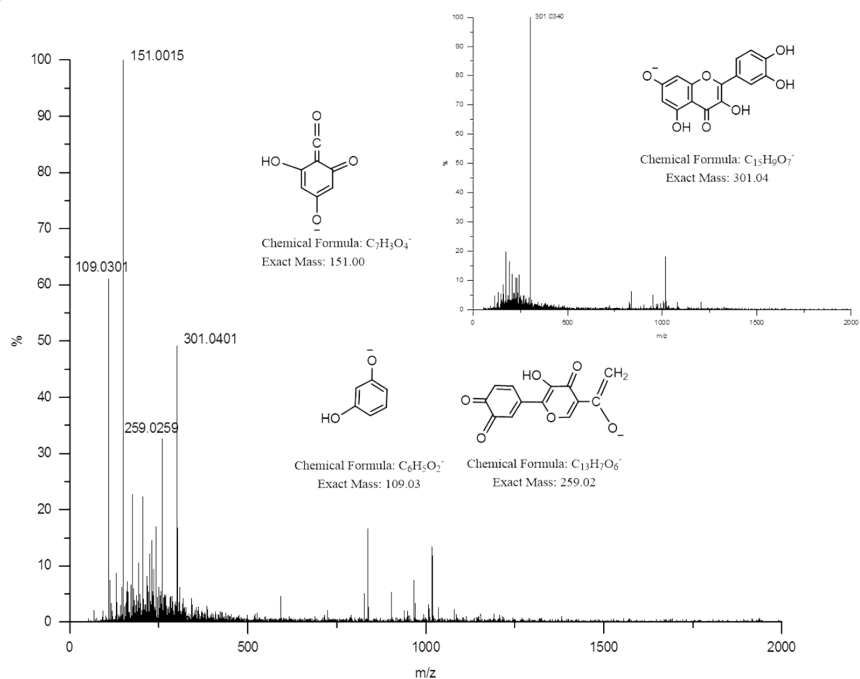

## Isohamnetin-3-O-glucoside

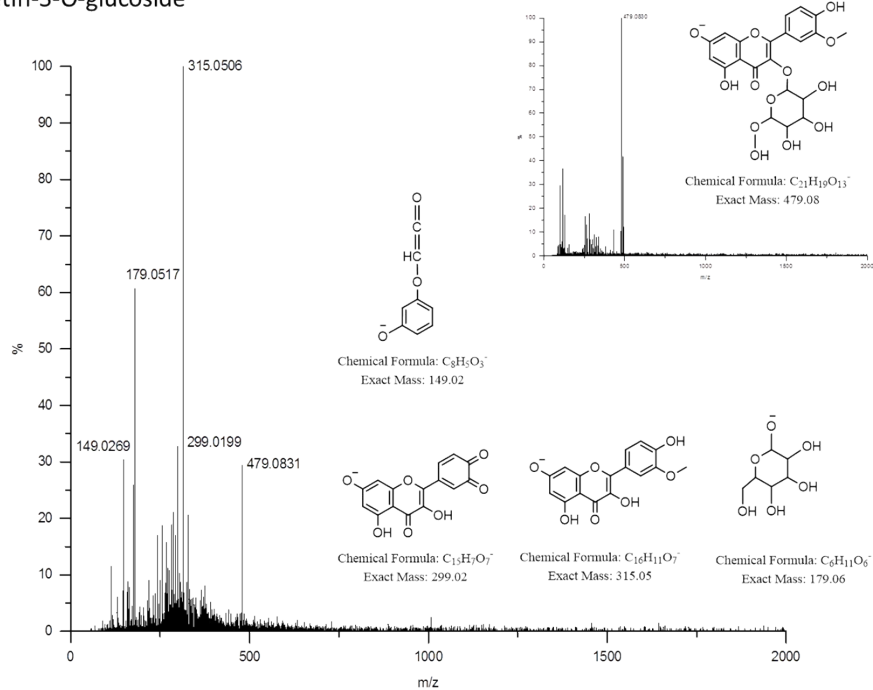

## Quercetin-3-O-glucoside

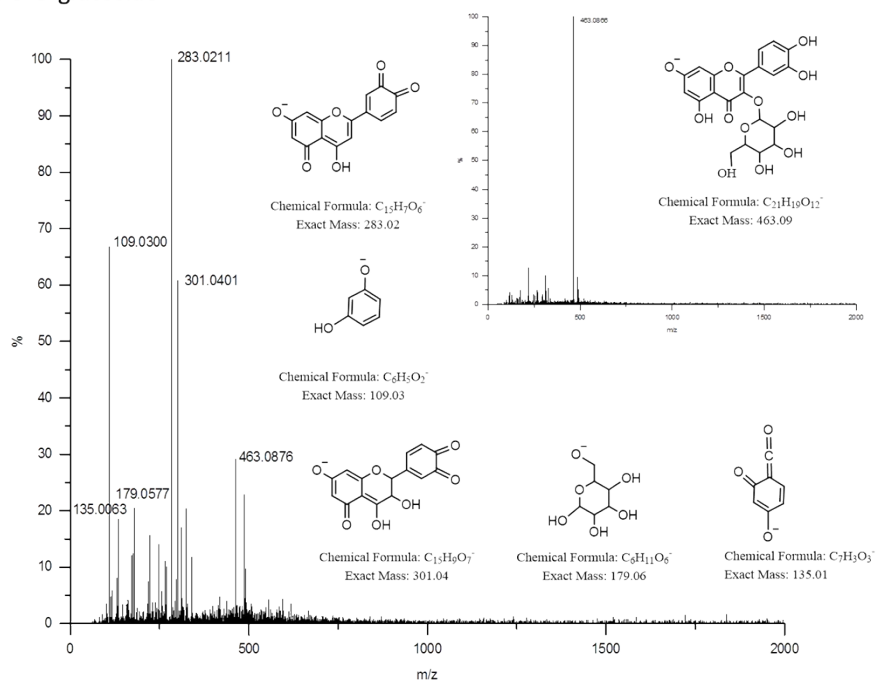

## Quercetin-3-O-glucoside-7-O-rhamnoside

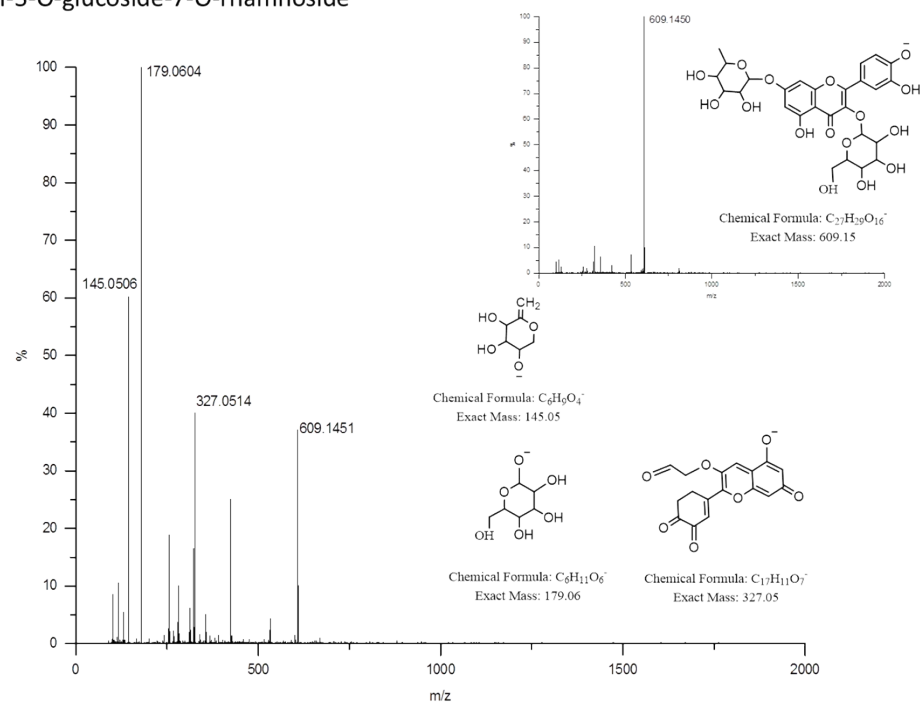

## Isohamnetin-3-O-glucoside-7-O-rhamnoside

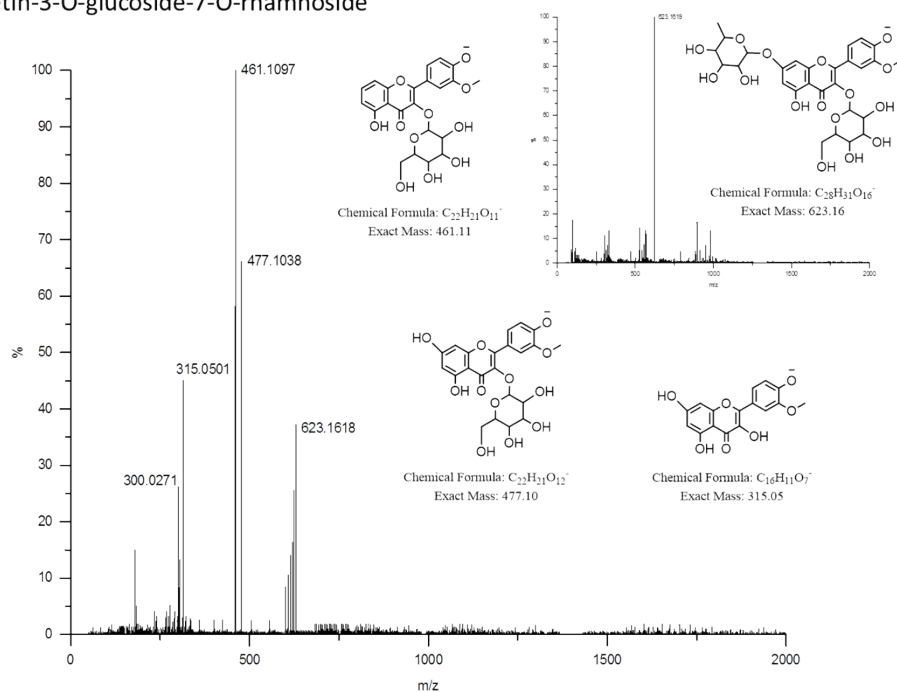

## Isorhamnetin-3-O-rutinoside

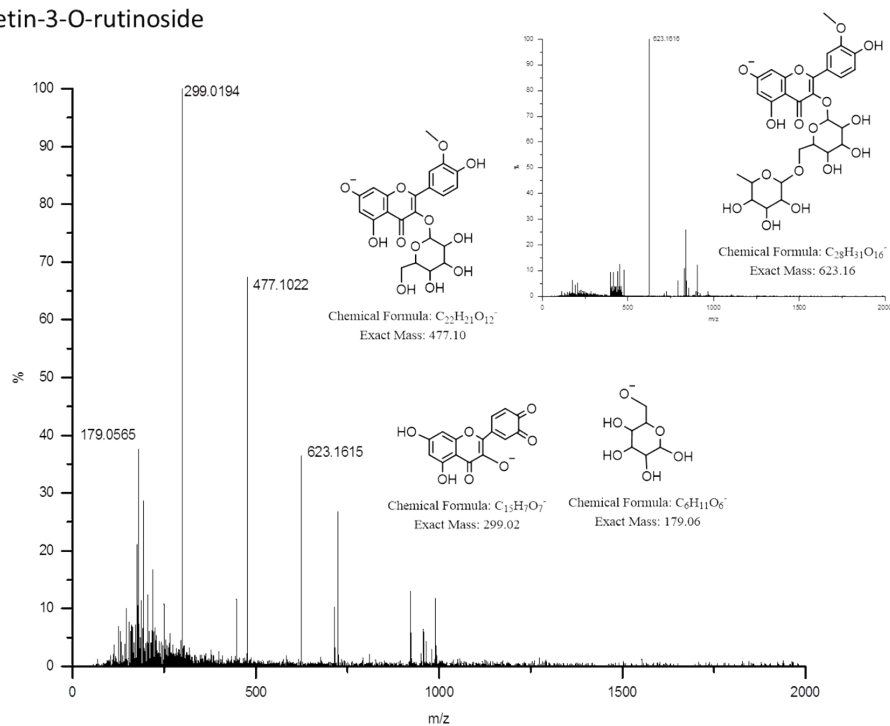

## Kaemferol-3-O-rutinoside

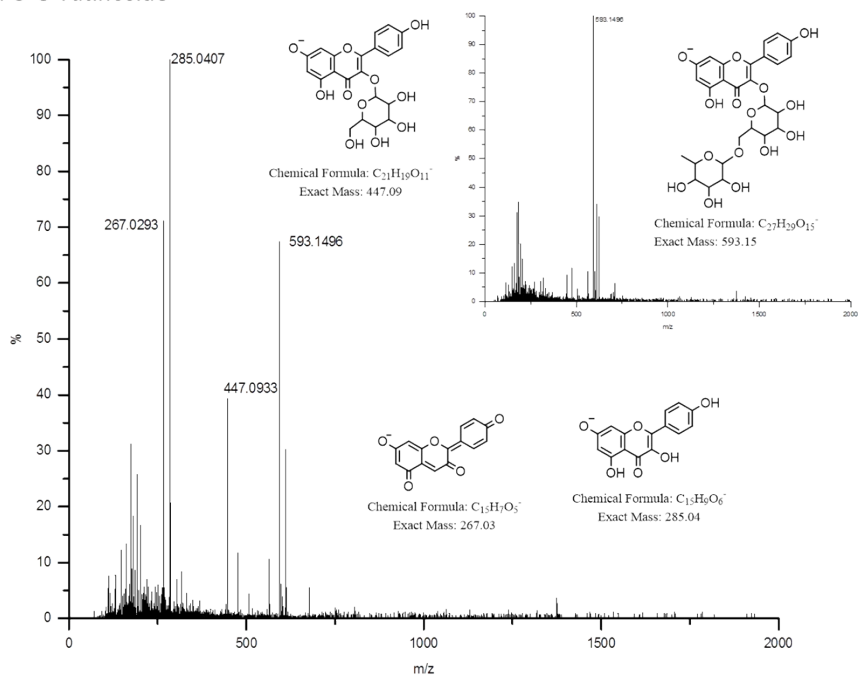

## Kaempferol

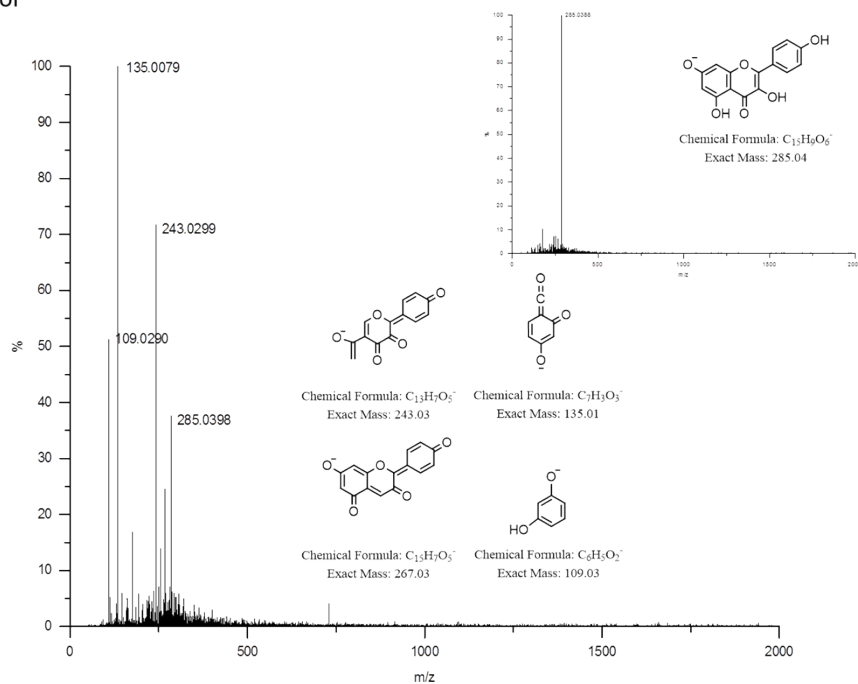

## Rutin

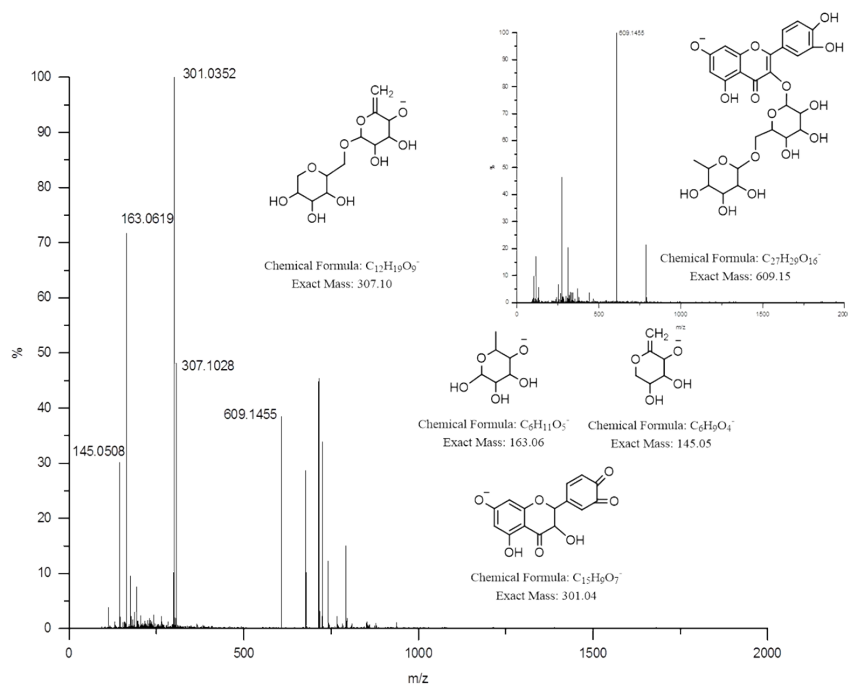

## Isorhamnetin

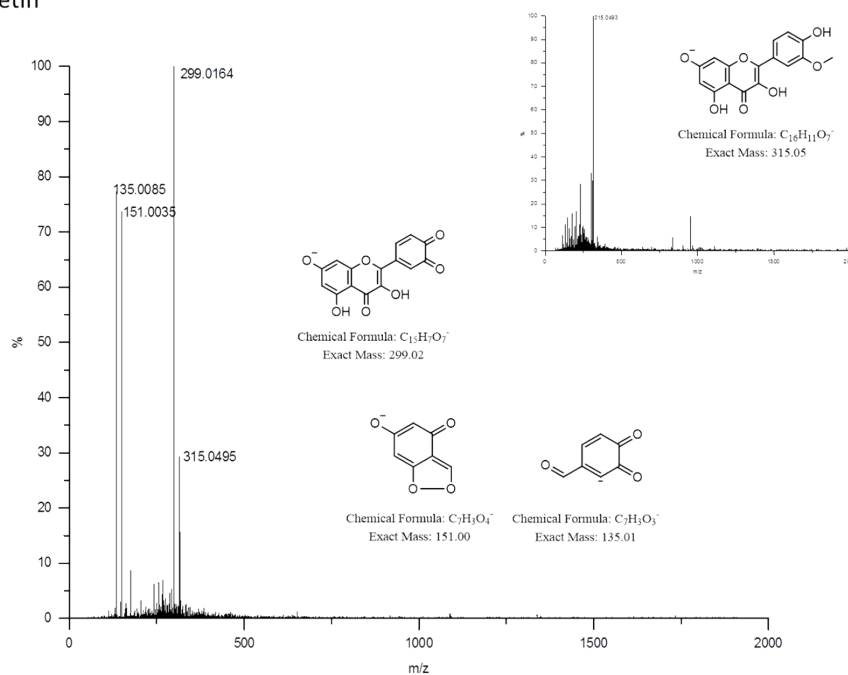

Figure S1. Structure and mass spectrums of the identified 14 compounds existed in SBSE. The chemical structures of the predicted fragments were drawn in the space.
